# Supplementary material for: A Histone Deacetylase Inhibitor Induces Acetyl-CoA Depletion Leading to Lethal Metabolic Stress in RAS-Pathway Activated Cells
Source: MDPI journal article supplement (doi:10.3390/cancers14112643), 2022-05-26

Original images for Figure S2a

WB ac-hist H3

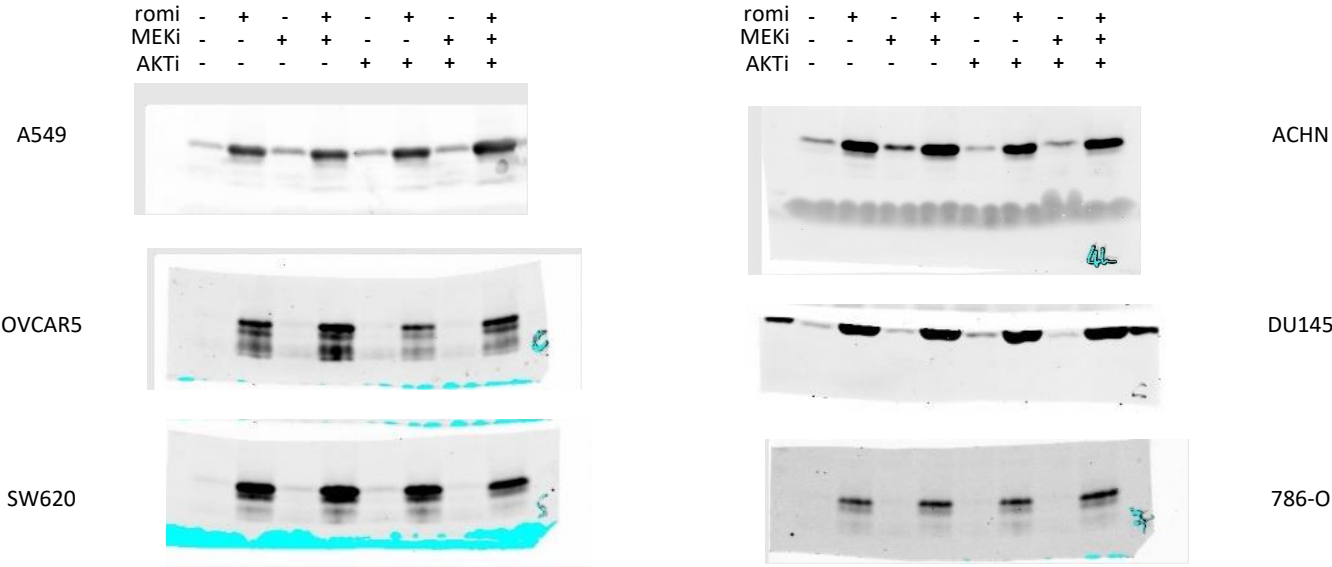

WB  $\gamma$ -H2AX

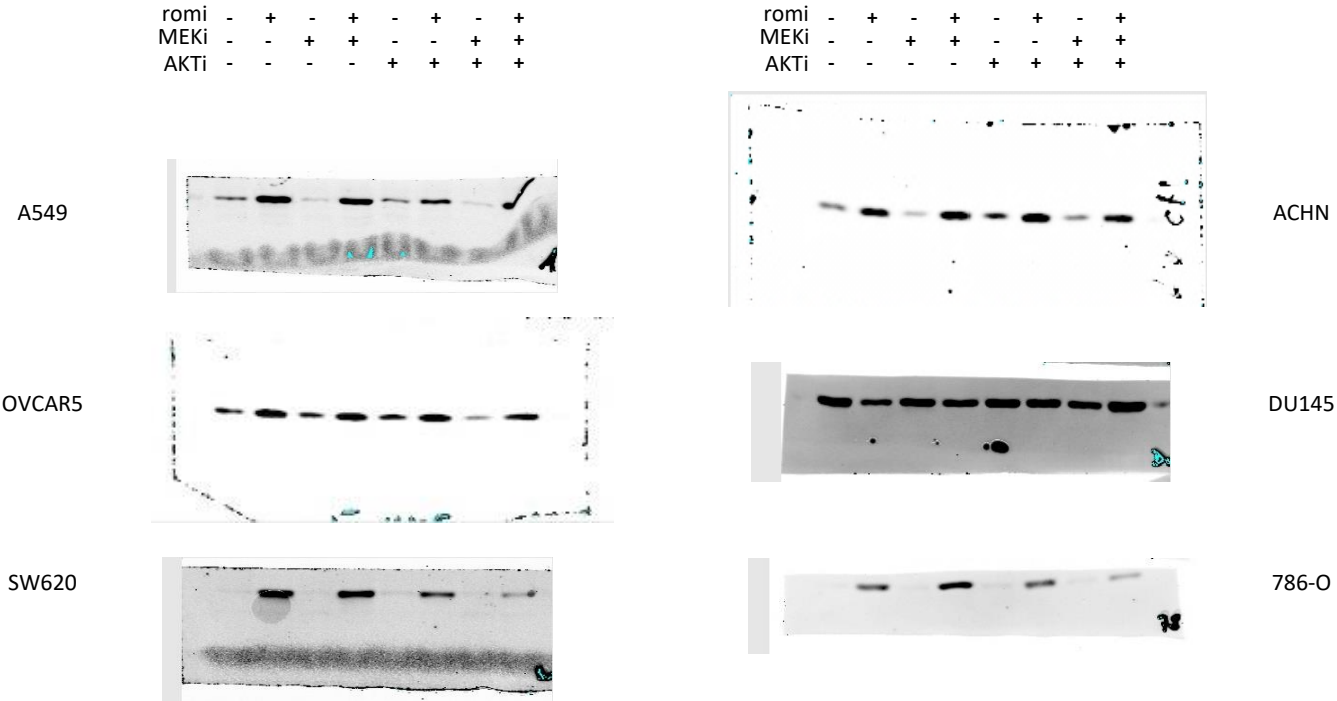

Original images for Supplementary Figure S8

WB ac-hist H3

WB hist H3

hour after treat. start

|      | 0 | 4 | 6 | 8 | 10 | 12 | 14 | 16 | 18 |
|------|---|---|---|---|----|----|----|----|----|
| +    |   |   |   |   |    |    |    |    |    |
| romi |   |   |   |   |    |    |    |    |    |

hour after treat. start

|      | 0 | 4 | 6 | 8 | 10 | 12 | 14 | 16 | 18 |
|------|---|---|---|---|----|----|----|----|----|
| +    |   |   |   |   |    |    |    |    |    |
| romi |   |   |   |   |    |    |    |    |    |

A549

ACHN

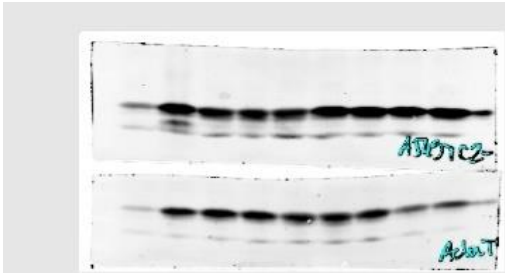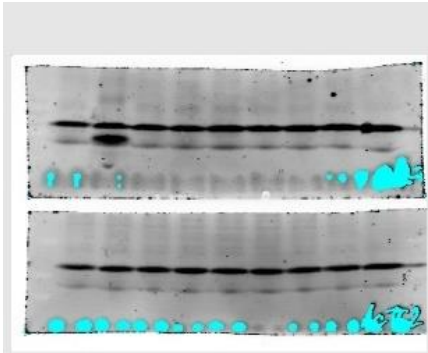

Supplement: s1 [file s1]
